# Supplementary material
Source: ML conference proceedings conference paper supplement (https://openreview.net/forum?id=HXJ6pUSn1L)
Supplement: supplementary_material [file FLARE_Appendix.pdf › FLARE_supplementary/FLARE_Appendix.pdf]

## 280 A Details of Q-former based Vision Language Embedding Module

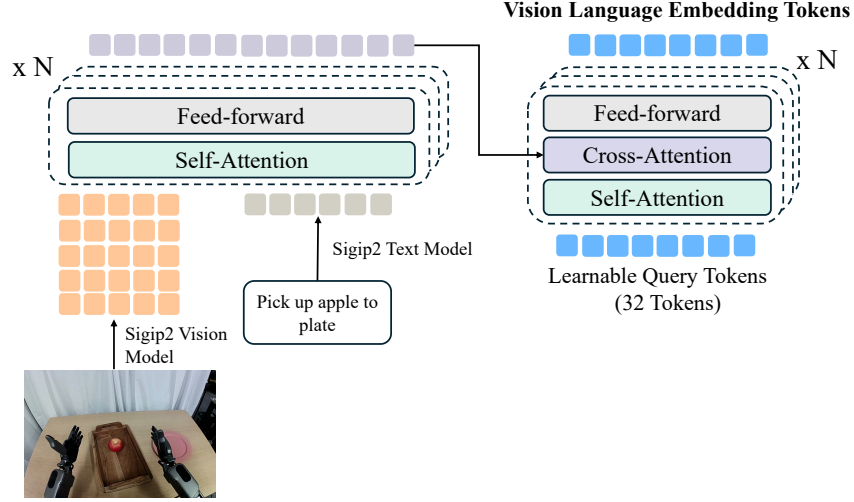

**Figure 9:** Our Q-former based Vision Language Embedding Module

281 We present the architectural details of our compact Q-former-based vision-language embedding  
 282 module. Specifically, we adopt siglip2-large-patch16-256 as the backbone for both vision and  
 283 language encoders. The SigLIP2 vision encoder processes 256×256 resolution robot images into  
 284 256 patch tokens, while the language encoder encodes padded robot instructions into 32 language  
 285 tokens. These 256 vision tokens and 32 language tokens are concatenated and passed through four  
 286 layers of self-attention transformers to yield 288 fused vision-language tokens. To obtain a compact  
 287 representation, we apply a Q-former architecture [15], where 32 learnable query tokens—randomly  
 288 initialized—interact with the 288 fused tokens through interleaved self-attention and cross-attention  
 289 layers, producing 32 compressed vision-language tokens.

## 290 B Pretraining Data Mixture

Details of pretraining data mixture is presented in Table 3.

**Table 3:** Action-Aware Vision Language Embedding Pre-training Dataset Statistics

| Dataset                   | Length (Frames) | Duration (hr) | FPS | Camera View                  | Category   |
|---------------------------|-----------------|---------------|-----|------------------------------|------------|
| GR-1 In-house Dataset     | 6.4M            | 88.4          | 20  | Egocentric                   | Real robot |
| DROID (OXE) [28]          | 23.1M           | 428.3         | 15  | Left, Right, Wrist           | Real robot |
| RT-1 (OXE) [29]           | 3.7M            | 338.4         | 3   | Egocentric                   | Real robot |
| Language Table (OXE) [30] | 7.0M            | 195.7         | 10  | Front-facing                 | Real robot |
| Bridge-v2 (OXE) [31]      | 2.0M            | 111.1         | 5   | Shoulder, left, right, wrist | Real robot |
| MUTEX (OXE) [32]          | 362K            | 5.0           | 20  | Wrist                        | Real robot |
| Plex (OXE) [33]           | 77K             | 1.1           | 20  | Wrist                        | Real robot |
| RoboSet (OXE) [34]        | 1.4M            | 78.9          | 5   | Left, Right, Wrist           | Real robot |
| GR-1 Simulation           | 125.5M          | 1,742.6       | 20  | Egocentric                   | Simulation |
| Total                     | 169.5M          | 2,989.5       | —   | —                            | —          |

291

## 292 C Training Details

293 For the pretraining of action-aware vision language embedding module, we use 256 NVIDIA  
 294 H100 GPUs with batch size 8192 for 150,000 gradient steps. We use AdamW [35] optimizer  
 295 with  $\beta_1 = 0.95$ ,  $\beta_2 = 0.999$ , and  $\epsilon = 1e-8$ . A weight decay of  $1e-5$  is applied, and the learning rate

296 follows a cosine scheduling strategy with a warmup ratio of 0.05. Following [2, 3], we sample the  
 297 flowmatching denoising timestep from  $p(\tau) = \text{Beta}(\frac{s-\tau}{s}; 1.5, 1)$ ,  $s = 0.999$ .  
 298 For the multitask experiments of FLARE conducted in Section 4.1 and 4.2, we use 32 NVIDIA H100  
 299 GPUS with batch size 1024 for 80,000 gradient steps, while keeping the rest of the hyperparameter  
 300 setups exactly the same.

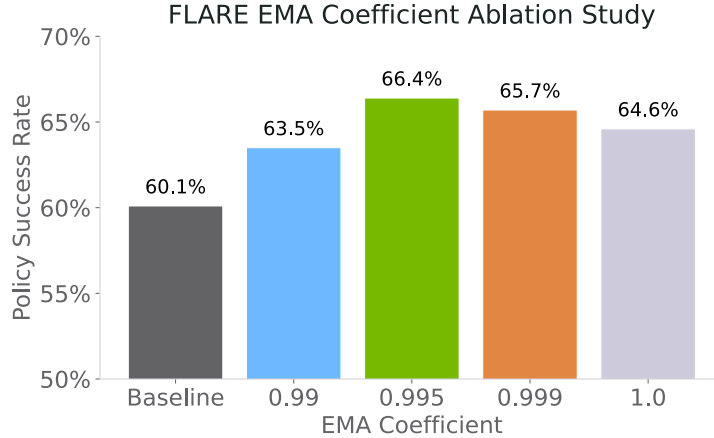

**Figure 10: Effect of EMA Coefficient  $\rho$ :** We report the policy success rate using  $24 \times 300$  training trajectories across 24 RoboCasa tasks. Baseline is trained without FLARE future alignment loss, i.e. a policy only objective.

## 301 D Exponential Moving Average (EMA) of Pretrained Action-aware 302 Embedding Model

303 As discussed in Section 3.2, to address the distribution shift between pretraining and downstream  
 304 tasks for our action-aware vision-language target embedding model, we incorporate an exponential  
 305 moving average (EMA) update. Specifically, at each gradient step, the target embedding model  
 306 parameters are updated as follows:

$$\theta_{\text{target\_vl\_embedding}} \leftarrow \rho \theta_{\text{target\_embedding}} + (1 - \rho) \theta_{\text{policy\_vl\_embedding}}$$

307 While the policy’s vision-language encoder is initialized from the target vision-language encoder,  
 308 i.e. pretrained action-aware vision-language embedding, it gradually adapts to the downstream task  
 309 during training via the action flow-matching objective. The EMA update enables the prediction target  
 310 to adapt slowly in tandem with the evolving policy encoder, providing stability across training.

311 We evaluate several choices of the EMA coefficient  $\rho \in \{0.99, 0.995, 0.999, 1.0\}$ , each using  $24 \times 300$   
 312 trajectories to train the FLARE policy. The final average success rates are reported in Figure 10.  
 313 We find that while all EMA variants outperform the baseline method without FLARE future latent  
 314 alignment objective,  $\rho = 0.995$  yields the best performance and is used in all experiments. Notably,  
 315 even with  $\rho = 1.0$  (i.e., no EMA), FLARE still surpasses the baseline, whereas  $\rho = 0.99$  performs  
 316 the worst, likely due to the instability caused by frequent target updates.

## 317 E Pseudocode of FLARE

318 Here we present a Python-style pseudocode of FLARE loss calculation as well as the entire training  
 319 loop.

---

### Algorithm 1 Python-style pseudocode for FLARE training

---

```
# target_vl_embedding: pretrained action-aware vision language embedding
# vl_embedding: vision language embedding of the current policy
# dit: diffusion transformer of the current policy
# action_embedding: 2-layer MLP to embed noisy actions
# state_embedding: 2-layer MLP to embed proprioceptive state
# action_decode: 2-layer MLP to decode robot's actions
# embedding_decode: 2-layer MLP to decode predicted embeddings
# N: Number of gradient steps
# M: Number of tokens in VL
# lambda: coefficient of FLARE loss (default is 0.2)

### Initialization
future_tokens = nn.Embedding(M, hidden_dim)
vl_embedding.load_state_dict(vl_embedding.state_dict())
target_vl_embedding.requires_grad = False

for n in range(N):
    obs, proprio, actions, future_obs = dataset.next()

    ### Prepare noisy action inputs
    noise = gaussian.sample()
    timestep = beta.sample() # sample flowmatching timestep
    noisy_action = timestep * actions + (1-timestep) * noise
    velocity = actions - noise

    ### Get state, action, and observation embedding tokens
    action_tokens = action_embed(noisy_action, timestep)
    state_token = state_embed(state)
    vl_tokens = vl_embedding(obs)

    ### Pass through DiT layers
    sa_tokens = torch.concat([state_token, action_tokens, future_tokens], dim=1)
    policy_outputs = dit(sa_tokens, vl_tokens)

    ### Calculate action flowmatching loss
    action_outputs = action_decoder(policy_outputs[:, 1:1 + action_tokens.shape[1]])
    action_loss = MSE(action_outputs, velocity)

    ### Calculate FLARE loss
    with torch.no_grad():
        embedding_to_align = target_vl_embedding(future_obs)
        predict_embedding = decode_embedding(policy_outputs[:, -M:])
        flare_loss = 1-COSINE_SIMILARITY(predict_embedding, embedding_to_align)

    ### Optimize the combined loss
    loss = action_loss + lambda * flare_loss
    optimizer.zero_grad()
    loss.backward()
    optimizer.step()
```

---

## 320 **F Real GR1 Humanoid Rollouts**

### 321 **F.1 4 Pick-and-place Tasks**

322 Below, we present policy rollouts from the FLARE trained policy on 4 real-world GR1 humanoid  
323 pick-and-place tasks, together with the task’s language instructions. Qualitatively, we observe that  
324 when manipulating objects such as bottled water or coke can, the FLARE policy learns to maneuver  
325 the hand around the object, climbing over the water bottle, rather than striking and knocking it over.  
326 For live 1x playback videos of the robot executions, please refer to the accompanying 3-minute video  
presentation.

pick up bottled water to basket

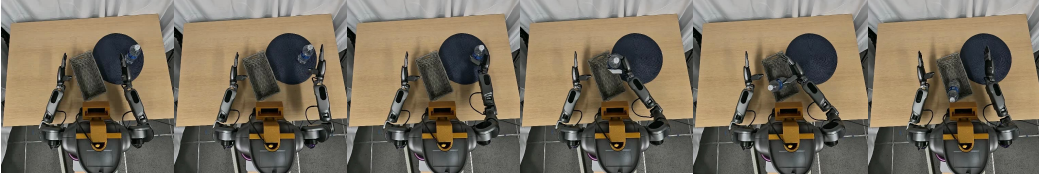

pick up can to plate

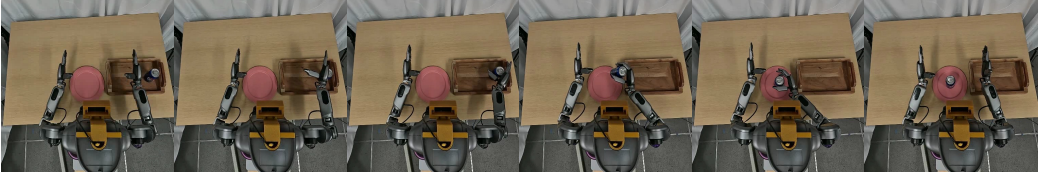

pick up cucumber to basket

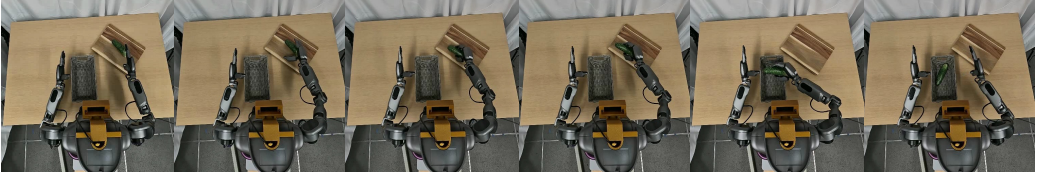

pick up apple to pan

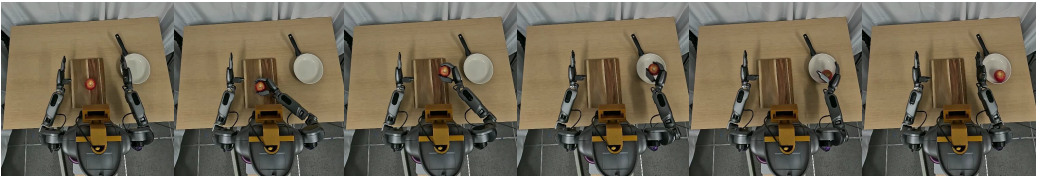

**Figure 11:** FLARE policy rollout on real GR1 humanoid robot with 4 pick-and-place tasks

327

328 **F.2 Manipulating Novel Objects**

329 Below, we present policy rollouts from the FLARE trained policy manipulating 5 novel objects. For  
330 live 1x playback videos of the robot executions, please refer to the accompanying 3-minute video  
presentation.

pick up stuffed toy to basket

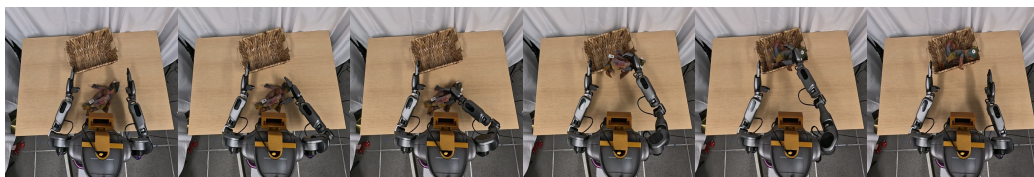

pick up hammer to plate

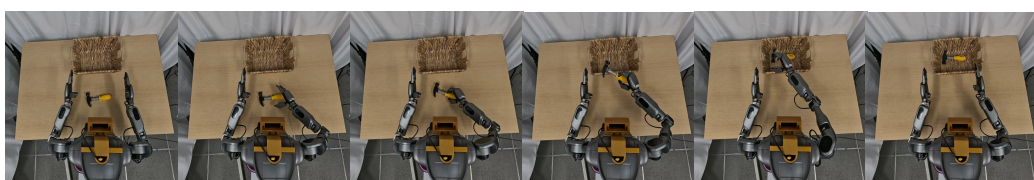

pick up blue tape to basket

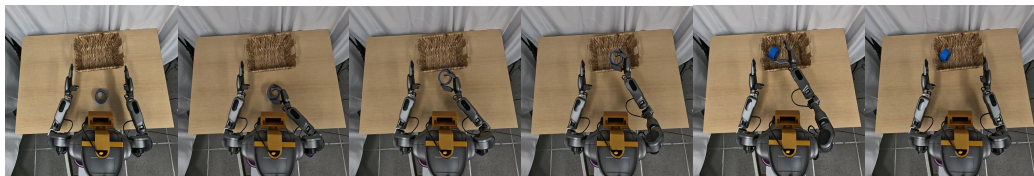

pick up blackboard eraser to pan

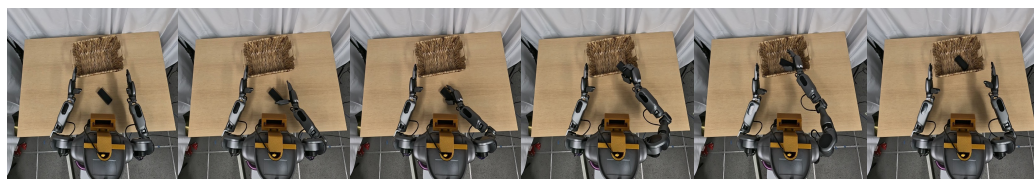

pick up umbrella to pan

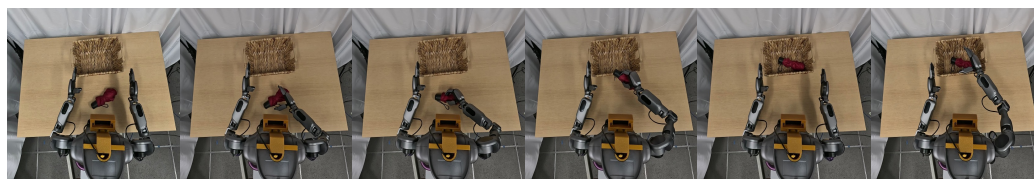

**Figure 12:** FLARE policy rollout manipulating 5 novel objects

331
